# Supplementary material for: Standardized Diagnostics Including PET-CT Imaging, Bilateral Tonsillectomy and Neck Dissection Followed by Risk-Adapted Post-Operative Treatment Favoring Radio-Chemotherapy Improve Survival of Neck Squamous Cell Carcinoma of Unknown Primary Patients
Source: PubMed Central journal article supplement (PMC8138574; doi:10.3389/fonc.2021.682088), 2021-05-07
Supplement: DataSheet_1.pdf [file DataSheet_1.pdf]

Table S1. Results from Kaplan-Meier cumulative survival plots for median and 75<sup>th</sup> percentile survival times and p values from log-rank tests as well as hazard ratios (HR) and 95% confidence intervals (CI 95%) in univariate Cox proportional hazard models for overall (OS) and tumor-specific survival (TSS) of various covariates demonstrating an impact on survival of NSCCUP patients according to multivariate Cox proportional hazard models. *P* values below 0.05 are in bold.

| Covariates and Characteristics |        | median (months) | 75th percentile (months) | <i>P</i> <sub>log rank</sub>  | <i>HR</i> <sub>Cox univariate</sub> (CI 95%) | <i>P</i> <sub>Cox univariate</sub> |
|--------------------------------|--------|-----------------|--------------------------|-------------------------------|----------------------------------------------|------------------------------------|
| <b>Overall survival</b>        |        |                 |                          |                               |                                              |                                    |
| Cohort                         | 1      | 50.5            | 18.1                     | 0.181                         | 1.464<br>(0.835-2.568)                       | 0.184                              |
|                                | 2      | -               | 25.3                     |                               |                                              |                                    |
| Age (years)                    | >60    | 51.4            | 25.0                     | 0.412                         | 1.261<br>(0.723-2.203)                       | 0.413                              |
|                                | ≤60    | -               | 22.4                     |                               |                                              |                                    |
| Smoking (pack years)           | >10    | 49.6            | 19.3                     | 0.054                         | 1.876<br>(0.978-3.584)                       | 0.058                              |
|                                | ≤10    | -               | 35.3                     |                               |                                              |                                    |
| Alcohol (g/day)                | >60    | 25.1            | 11.3                     | <b>3.71 × 10<sup>-3</sup></b> | 2.252<br>(1.282-3.953)                       | <b>4.74 × 10<sup>-3</sup></b>      |
|                                | others |                 | 29.3                     |                               |                                              |                                    |
| HPV16-related                  | yes    | -               | -                        | <b>2.75 × 10<sup>-3</sup></b> | 26.06<br>(0.90-753.3)                        | 0.057                              |
|                                | no     | 50.5            | 19.3                     |                               |                                              |                                    |
| N categories                   | N3     | 31.0            | 16.5                     | 0.152                         | 1.582<br>(0.840-2.976)                       | 0.156                              |
|                                | others | -               | 24.7                     |                               |                                              |                                    |
| N categories                   | N1     | -               | 53.0                     | 0.086                         | 0.453                                        | 0.094                              |

|                  |         |      |      |                               |               |                               |
|------------------|---------|------|------|-------------------------------|---------------|-------------------------------|
|                  | others  | 52.8 | 18.1 |                               | (0.180-1.144) |                               |
| Neck dissection  | no ND   | 49.6 | 16.7 | 0.318                         | 1.380         | 0.320                         |
|                  | ND      | -    | 24.7 |                               | (0.732-2.602) |                               |
| Tonsillectomy    | no      | 50.5 | 16.7 | 0.201                         | 1.206         | 0.320                         |
|                  | yes     | -    | 25.3 |                               | (0.903-1.610) |                               |
| Surgery          | yes     | -    | 22.4 | 0.763                         | 0.804         | 0.763                         |
|                  | no      | 55.9 | 18.1 |                               | (0.195-3.321) |                               |
| R status         | R0      | -    | 37.4 | <b>8.17 × 10<sup>-6</sup></b> | 0.296         | <b>2.54 × 10<sup>-5</sup></b> |
|                  | R+      | 22.4 | 12.2 |                               | (0.168-0.522) |                               |
| ECE              | ECE+    | 25.3 | 14.2 | <b>6.35 × 10<sup>-6</sup></b> | 3.817         | <b>2.52 × 10<sup>-5</sup></b> |
|                  | no      | -    | 52.8 |                               | (2.045-7.092) |                               |
| Cisplatin        | yes     | -    | 37.4 | 0.111                         | 0.620         | 0.115                         |
|                  | no      | 50.5 | 18.1 |                               | (0.342-1.123) |                               |
| Radiotherapy     | yes     | -    | 22.4 | 0.964                         | 0.983         | 0.964                         |
|                  | no      | 53.0 | 25.6 |                               | (0.478-2.024) |                               |
| PFS              | relapse | 25.1 | 12.2 | <b>7.51 × 10<sup>-7</sup></b> | 3.831         | <b>3.99 × 10<sup>-6</sup></b> |
|                  | yes     | -    | 47.4 |                               | (2.165-6.803) |                               |
| Primary detected | yes     | 29.6 | 22.4 | 0.980                         | 1.013         | 0.980                         |
|                  | no      | -    | 24.7 |                               | (0.364-2.817) |                               |
| Nodal control    | relapse | 37.8 | 9.0  | 0.240                         | 1.658         | 0.603                         |
|                  | NC      | -    | 24.7 |                               | (0.707-3.891) |                               |

|                      |         |      |      |                               |               |                               |
|----------------------|---------|------|------|-------------------------------|---------------|-------------------------------|
| Locoregional control | relapse | 37.8 | 19.3 | 0.236                         | 1.517         | 0.239                         |
|                      | LRC     | -    | 25.0 |                               | (0.758-3.03)  |                               |
| Distant control      | relapse | 17.6 | 10.4 | <b>6.83 × 10<sup>-6</sup></b> | 4.464         | <b>3.84 × 10<sup>-5</sup></b> |
|                      | DC      | -    | 25.6 |                               | (2.193-9.091) |                               |
| Other cancer entity  | yes     | 50.5 | 20.8 | 0.639                         | 1.276         | 0.640                         |
|                      | no      | -    | 24.0 |                               | (0.459-3.546) |                               |

---

### Tumor-specific survival

|                      |        |      |      |                               |                |                               |
|----------------------|--------|------|------|-------------------------------|----------------|-------------------------------|
| Cohort               | 1      | -    | 25.6 | 0.467                         | 1.311          | 0.469                         |
|                      | 2      | -    | 55.9 |                               | (0.630-2.726)  |                               |
| Age (years)          | >60    | -    | -    | 0.304                         | 0.664          | 0.307                         |
|                      | ≤60    | -    | 25.3 |                               | (0.302-1.458)  |                               |
| Smoking (pack years) | >10    | -    | 25.3 | 0.158                         | 1.828          | 0.165                         |
|                      | ≤10    | -    | -    |                               | (0.781-4.292)  |                               |
| Alcohol (g/day)      | >60    | 50.5 | 12.2 | <b>6.09 × 10<sup>-4</sup></b> | 3.333          | <b>1.23 × 10<sup>-3</sup></b> |
|                      | others | -    | -    |                               | (1.605-6.944)  |                               |
| HPV16-related        | yes    | -    | -    | <b>0.024</b>                  | 25.95          | 0.151                         |
|                      | no     | -    | 25.6 |                               | (0.31-2211.29) |                               |
| N categories         | N3     | -    | 35.3 | 0.886                         | 1.073          | 0.886                         |
|                      | others | -    | 37.5 |                               | (0.409-2.816)  |                               |

|                  |         |      |      |                                |               |                               |
|------------------|---------|------|------|--------------------------------|---------------|-------------------------------|
| N categories     | N1      | -    | -    | 0.221                          | 0.481         | 0.232                         |
|                  | others  | -    | 25.6 |                                | (0.145-1.595) |                               |
| Neck dissection  | no ND   | -    | 29.6 | 0.625                          | 1.237         | 0.625                         |
|                  | ND      | -    | 37.8 |                                | (0.527-2.905) |                               |
| Tonsillectomy    | no      | -    | 25.6 | 0.245                          | 1.252         | 0.249                         |
|                  | yes     | -    | 55.9 |                                | (0.854-1.837) |                               |
| Surgery          | yes     | -    | 35.3 | 0.301                          | 0.475         | 0.312                         |
|                  | no      | 55.9 | 18.1 |                                | (0.112-2.008) |                               |
| R status         | R0      | -    | -    | <b>3.63 × 10<sup>-4</sup></b>  | 0.278         | <b>8.27 × 10<sup>-4</sup></b> |
|                  | R+      | 29.6 | 17.6 |                                | (0.132-0.589) |                               |
| ECE              | ECE+    | -    | 19.3 | <b>7.08 × 10<sup>-4</sup></b>  | 3.759         | <b>1.56 × 10<sup>-3</sup></b> |
|                  | no      | -    | -    |                                | (1.656-8.547) |                               |
| Cisplatin        | yes     | -    | -    | 0.198                          | 0.600         | 0.203                         |
|                  | no      | -    | 25.3 |                                | (0.273-1.318) |                               |
| Radiotherapy     | yes     | -    | 35.3 | 0.948                          | 1.032         | 0.948                         |
|                  | no      | -    | 37.4 |                                | (0.394-2.71)  |                               |
| PFS              | relapse | 25.1 | 13.8 | <b>5.23 × 10<sup>-17</sup></b> | 257.1         | <b>3.52 × 10<sup>-3</sup></b> |
|                  | yes     | -    | -    |                                | (6.2-10675.8) |                               |
| Primary detected | yes     | 29.6 | 22.4 | 0.265                          | 1.808         | 0.272                         |
|                  | no      | -    | 37.8 |                                | (0.629-5.208) |                               |
| Nodal control    | relapse | 55.9 | 16.7 | <b>0.047</b>                   | 2.564         | 0.056                         |
|                  | NC      | -    | 37.4 |                                | (0.977-6.711) |                               |

|                      |         |      |      |                                |               |                               |
|----------------------|---------|------|------|--------------------------------|---------------|-------------------------------|
| Locoregional control | relapse | 37.8 | 19.3 | <b>0.010</b>                   | 2.688         | <b>0.014</b>                  |
|                      | LRC     | -    | 53.0 |                                | (1.224-5.917) |                               |
| Distant control      | relapse | 17.6 | 10.4 | <b>2.76 × 10<sup>-11</sup></b> | 9.434         | <b>3.76 × 10<sup>-8</sup></b> |
|                      | DC      | -    | 37.4 |                                | (4.237-20.83) |                               |
| Other cancer entity  | yes     | 50.5 | 20.8 | 0.116                          | 2.278         | 0.126                         |
|                      | no      | -    | 37.8 |                                | (0.792-6.536) |                               |

---
